# Supplementary material for: Serum levels of miR-320 family members are associated with clinical parameters and diagnosis in prostate cancer patients
Source: PubMed Central journal article supplement (PMC5828216; doi:10.18632/oncotarget.23781), 2017-12-30
Supplement: oncotarget-09-10402-s001.pdf [file oncotarget-09-10402-s001.pdf]

## Serum levels of miR-320 family members are associated with clinical parameters and diagnosis in prostate cancer patients

### SUPPLEMENTARY MATERIALS

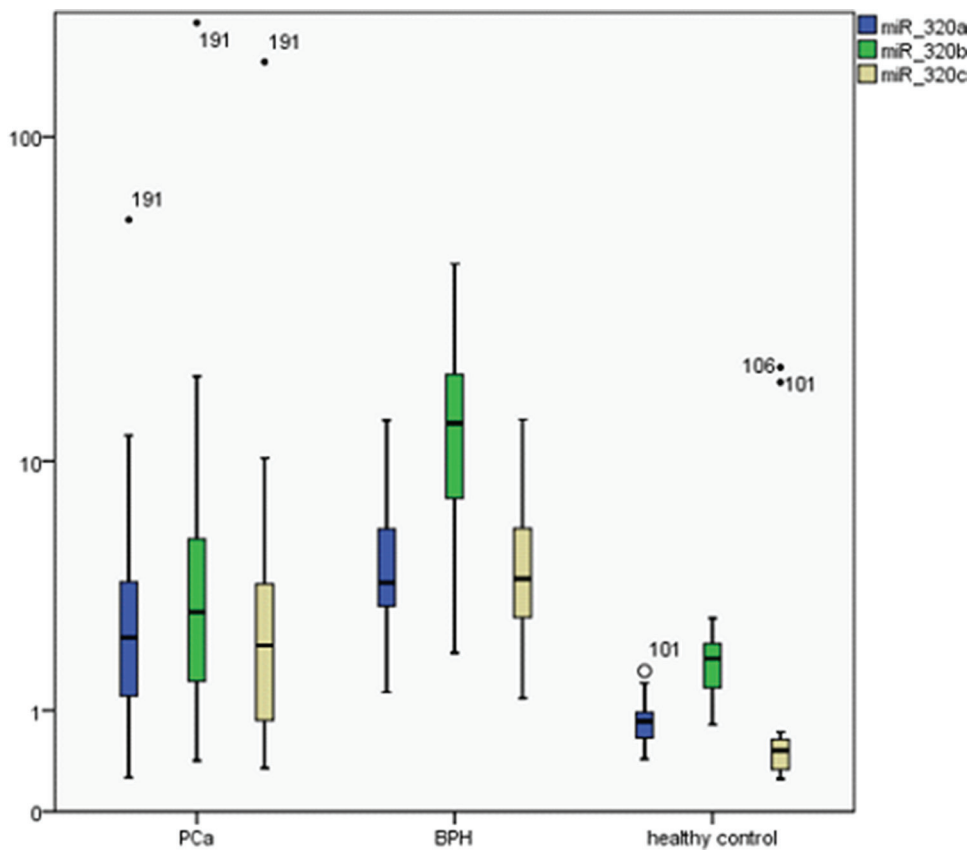

Supplementary Figure 1: Box plot: Expression levels of miR-320a,-b and -c in the three groups PCa, BPH and healthy control.

Supplementary Table 1: Target analysis for mir-320a/-b/-c and pathway enrichment analysis. See Supplementary\_Table\_1

Supplementary Table 2: Validated target genes/proteins of the miR-320 family members. See Supplementary\_Table\_2
